# Supplementary material
Source: PubMed Central journal article supplement (PMC8111137)
Supplement: JCM.02342-20-s0001.pdf [file JCM.02342-20-s0001.pdf]

**Supplementary data**

**Revised JCM**

**Evaluating ten commercially-available SARS-CoV-2 rapid serological tests using the STARD (Standards for Reporting of Diagnostic Accuracy Studies) method.**

Supplemental figures: 4

Supplemental tables: 3

**Supplemental Figures**

**Figure S1.** Index (panel A) and results of negative, weak positive, medium/high positive, and undetermined tests.

**A**

| Rating index | Reading intensity scale            |
|--------------|------------------------------------|
| 0            | Not reactive                       |
| 1            | Very weak, but definitely reactive |
| 2            | Medium to high reactivity          |
| U            | Undetermined                       |

**B**

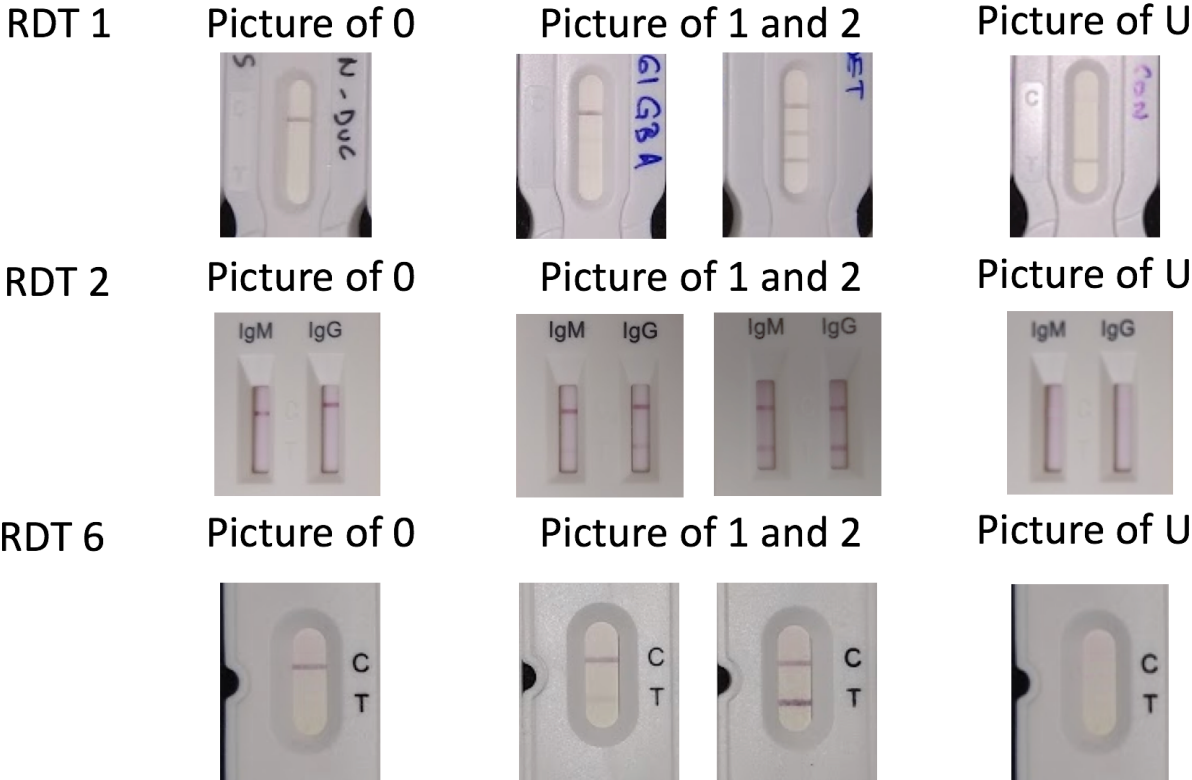

**Figure S2.** Assessment of cumulative positivity stratified by the number days after symptom appearance.

| Day after onset of symptoms | 1 | 2 | 3 | 4 | 5 | 6 | ... | N |
|-----------------------------|---|---|---|---|---|---|-----|---|
| Patient 1                   | n | n | n | n | N |   |     |   |
| Patient 2                   | N |   |   |   |   |   |     |   |
| Patient 3                   |   |   |   |   | P | p | p   | p |
| Patient 4                   | n | n | N |   |   |   | P   | p |
| Patient 5                   | N | n | n | N |   | P | p   | p |
| Patient 6                   | P | p | p | p | p | p | p   | p |

|                                       |           |           |           |              |              |            |            |            |
|---------------------------------------|-----------|-----------|-----------|--------------|--------------|------------|------------|------------|
| Cumulative number of negative results | 4         | 3         | 3         | 2            | 1            | 0          | 0          | 0          |
| Cumulative number of positive results | 1         | 1         | 1         | 1            | 2            | 3          | 4          | 4          |
| <b>Cumulative % of positivity</b>     | <b>20</b> | <b>25</b> | <b>25</b> | <b>33,33</b> | <b>66,67</b> | <b>100</b> | <b>100</b> | <b>100</b> |

|          |                                |          |                                |
|----------|--------------------------------|----------|--------------------------------|
| <b>P</b> | Sample tested positive         | <b>N</b> | Sample tested negative         |
| <b>p</b> | Sample interpreted as positive | <b>n</b> | Sample interpreted as negative |

Only one serum was available (and tested) for patients 1, 2, 3 and 6  
 Two sera were available (and tested) for patients 4  
 Three sera were available (and tested) for patients 5

**Figure S3.** Best fit asymmetric curve for RDT 1, RDT 6 and RDT 9 test cumulative positivity.

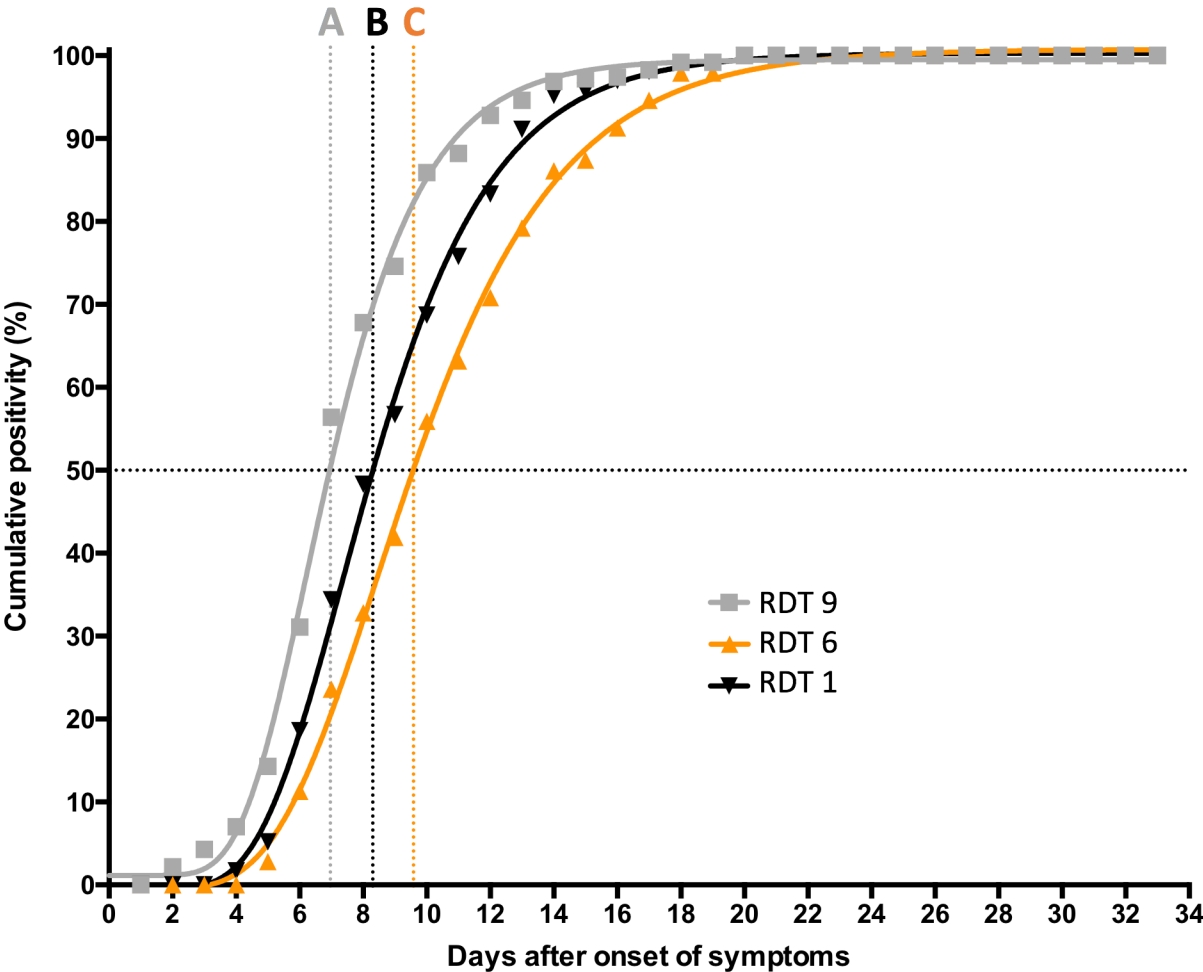

A = 6.962 (CI95%: 6.837 – 7.087)  
B = 8.297 (CI95%: 8.185 – 8.409)  
C = 9.579 (CI95%: 9.437 – 9.722)

**Figure S4.** Influence of population prevalence of seropositivity on assay performance.

Scenarios with increasing population prevalence (x-axis) are shown for each RDT. PPV (Positive Predictive value) and NPV (Negative predictive value) expressed in percentage (y axis) have been calculated using VassarStats (<http://vassarstats.net/>). Zones for which both PPV and NPV are above 90% (red zone) or above 95% (green zone) are indicated.

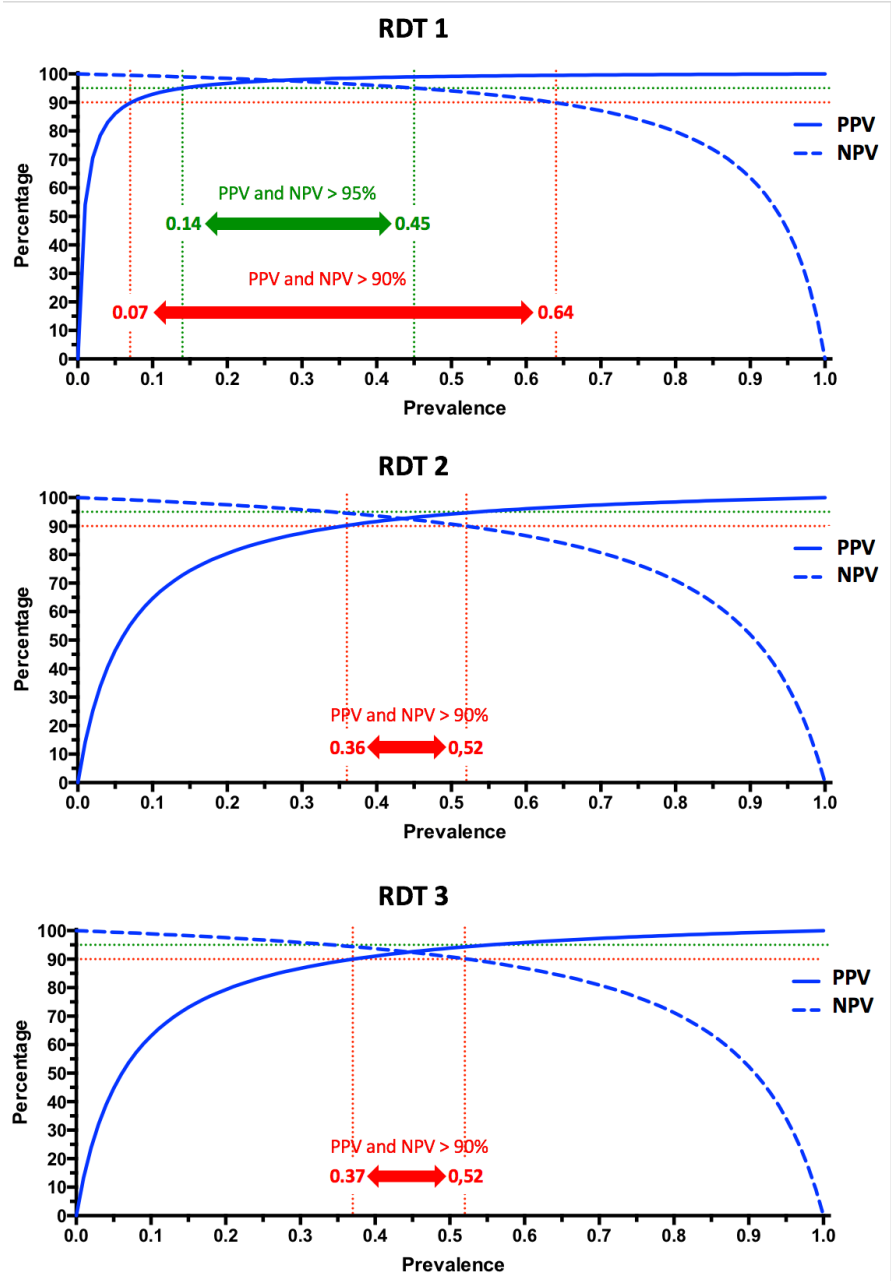

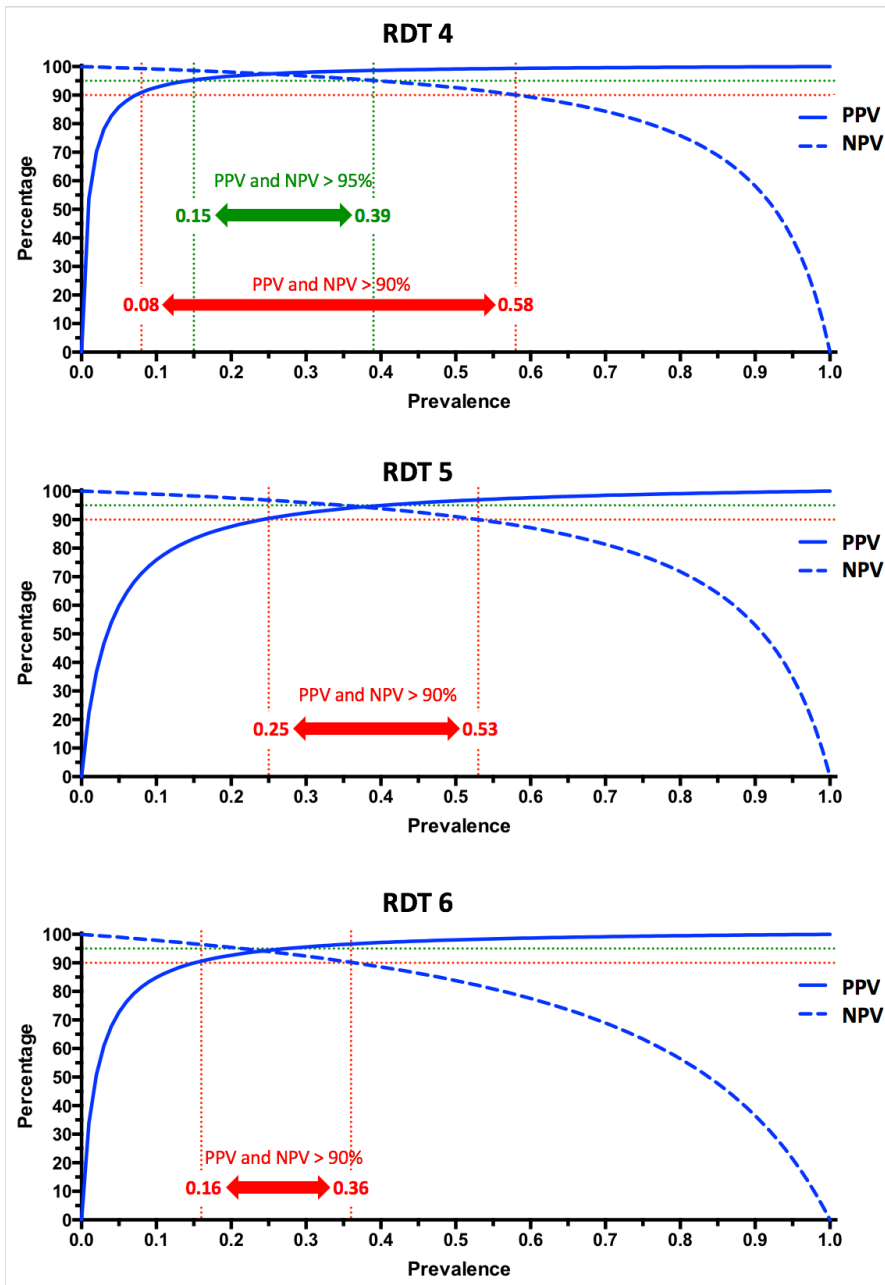

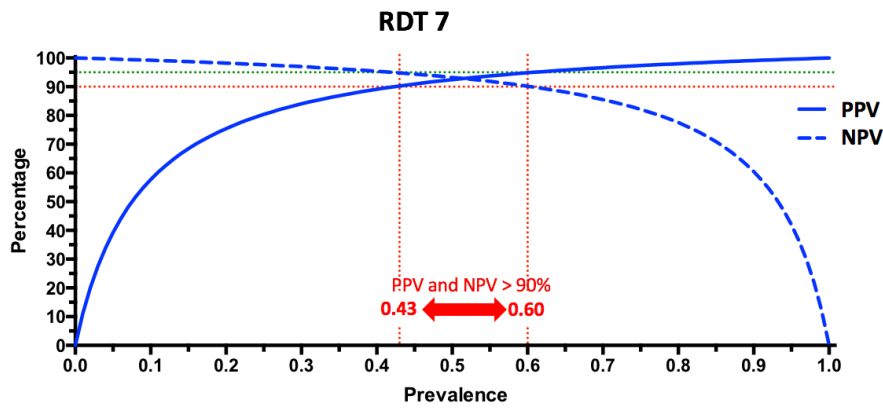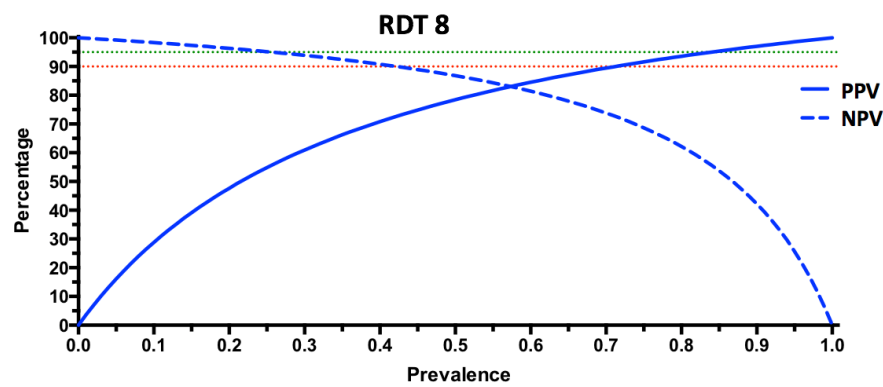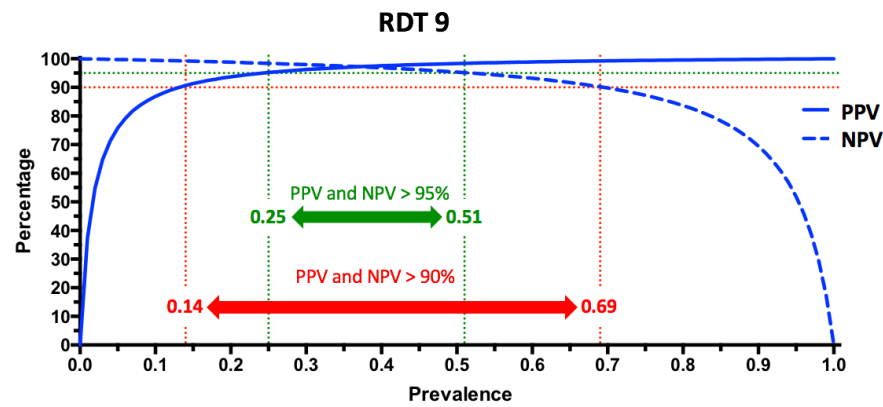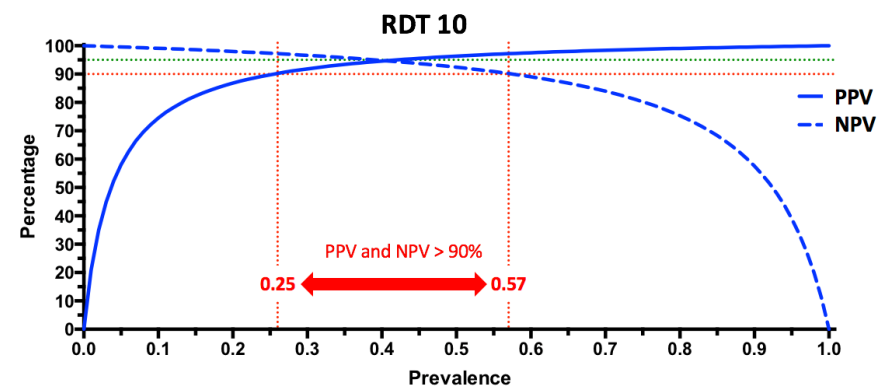

**Table S1: Immunoassay kit and manufacturer information**

|                                    | RDT 1                                                                              | RDT 2                                                                              | RDT 3                                                                              | RDT 4                                                                               | RDT 5                                                                                | RDT 6                                                                                | RDT 7                                                                                | RDT 8                                                                                | RDT 9                                                                                | RDT 10                                                                               |
|------------------------------------|------------------------------------------------------------------------------------|------------------------------------------------------------------------------------|------------------------------------------------------------------------------------|-------------------------------------------------------------------------------------|--------------------------------------------------------------------------------------|--------------------------------------------------------------------------------------|--------------------------------------------------------------------------------------|--------------------------------------------------------------------------------------|--------------------------------------------------------------------------------------|--------------------------------------------------------------------------------------|
| <b>Name</b>                        | NG-Test IgG-IgM COVID-19                                                           | Anti-SARS-CoV-2 Rapid test                                                         | Novel Coronavirus (2019-nCoV) Antibody IgG/IgM Assay Kit                           | NADAL COVID-19 IgG/IgM Test                                                         | Biosynex COVID-19 BSS                                                                | 2019-nCoV Ab Test                                                                    | 2019-nCoV IgG/IgM                                                                    | COVID-19-CHECK-1                                                                     | Finecare SARS-CoV-2 Antibody Test                                                    | Wondfo SARS-CoV-2 Antibody Test                                                      |
| <b>Manufacturer</b>                | NG Biotech SA, Guipry, France                                                      | Autobio Diagnostics Co, Ltd, Zhengzhou, China                                      | Avioq Bio-tech Co, Ltd, Shandong, China                                            | Nal Von Minden Co, Ltd, Moers, Germany                                              | Biosynex SWISS SA, Fribourg, Switzerland                                             | Innovita (Tangshan) Biological Technology Co, Ltd, Hebei, China                      | Biolidics Co, Ltd, Mapex, Singapore                                                  | Vedal Lab SA, Alençon, France                                                        | Wondfo Biotech Co, Ltd, Guangzhou, China                                             | Wondfo Biotech Co, Ltd, Guangzhou, China                                             |
| Catalogue No./manufacturer Ref     | NGB-COV-W23-002                                                                    | RTA0202                                                                            | ---                                                                                | COV20030034                                                                         | SW40005                                                                              | ---                                                                                  | C8B-F015016-B1                                                                       | 200081-4-2-3L                                                                        | W276                                                                                 | W195                                                                                 |
| Lot number tested                  | 200414-01                                                                          | 21C22-J01                                                                          | 20200201                                                                           | 243001                                                                              | COV20040003                                                                          | 20200402                                                                             | V5020032352                                                                          | 23040-46                                                                             | F27614309AD                                                                          |                                                                                      |
| <b>Product description</b>         |                                                                                    |                                                                                    |                                                                                    |                                                                                     |                                                                                      |                                                                                      |                                                                                      |                                                                                      |                                                                                      |                                                                                      |
| Antibody detection                 | IgG-IgM                                                                            | IgG-IgM                                                                            | IgG-IgM                                                                            | IgG-IgM                                                                             | IgG-IgM                                                                              | IgG-IgM                                                                              | IgG-IgM                                                                              | IgG-IgM                                                                              | Total Ab                                                                             | IgG/IgM 1 test, 1 line                                                               |
| Antigens *                         | NP, SP                                                                             | ---                                                                                | ---                                                                                | ---                                                                                 | ---                                                                                  | NP, SP                                                                               | ---                                                                                  | ---                                                                                  | ---                                                                                  | ---                                                                                  |
| Detection conjugate                | Colloidal gold                                                                     | Colloidal gold                                                                     | Colloidal gold                                                                     | Colloidal gold                                                                      | Colloidal gold                                                                       | Colloidal gold                                                                       | Colloidal gold                                                                       | Colloidal gold                                                                       | Fluorescent conjugate                                                                | Colloidal gold                                                                       |
| Type of reading                    | Visual                                                                             | Visual                                                                             | Visual                                                                             | Visual                                                                              | Visual                                                                               | Visual                                                                               | Visual                                                                               | Visual                                                                               | UV automatic reader                                                                  | Visual                                                                               |
| Format                             | cassette with single lane and different band for IgG and IgM                       | cassette with separate lane for IgG and IgM                                        | cassette with single lane and different band for IgG and IgM                       | cassette with single lane and different band for IgG and IgM                        | cassette with single lane and different band for IgG and IgM                         | cassette with separate lane and different band for IgG and IgM                       | cassette with single lane and different band for IgG and IgM                         | cassette with single lane and different band for IgG and IgM                         | cassette with single lane and single band for both IgG and IgM                       | cassette with single lane and single band for both IgG and IgM                       |
| <b>Specifications</b>              |                                                                                    |                                                                                    |                                                                                    |                                                                                     |                                                                                      |                                                                                      |                                                                                      |                                                                                      |                                                                                      |                                                                                      |
| Sample type                        | WB/Serum/Plasma                                                                    | WB/Serum/Plasma                                                                    | WB/Serum/Plasma                                                                    | WB/Serum/Plasma                                                                     | WB/Serum/Plasma                                                                      | WB/Serum/Plasma                                                                      | WB/Serum/Plasma                                                                      | WB/Serum/Plasma                                                                      | WB/Serum/Plasma                                                                      | WB/Serum/Plasma                                                                      |
| Sample volume                      | 10µL                                                                               | 5µL                                                                                | 10µL                                                                               | 5µL (S, P), 10µL (WB)                                                               | 10µL                                                                                 | 10µL                                                                                 | 20µL                                                                                 | 10 µL                                                                                | 10µL                                                                                 | 10 µL                                                                                |
| Pipette for sample volume provided | Not provided but system integrated to device for direct transfer for Capillary WB  | Not provided                                                                       | transfer system, lancet                                                            | Not provided                                                                        | Plastic disposable pipettes                                                          | Not provided                                                                         | Not provided                                                                         | Not provided                                                                         | pipette tips and tubes of detection buffer                                           | Not provided                                                                         |
| Diluent volume                     | 2 drops                                                                            | 60µL                                                                               | 2 drops (50-70µL)                                                                  | 2 drops                                                                             | 2 drops (80 µL)                                                                      | 2 drops (80 µL)                                                                      | 3 drops                                                                              | 3 drops (100 µL)                                                                     | ---                                                                                  | 2-3 drops                                                                            |
| Diluant bottle format              | 1.5 mL                                                                             | 4,5 mL                                                                             | 4.5 mL                                                                             | 3 mL                                                                                | ---                                                                                  | 5 mL                                                                                 | 5 mL                                                                                 | 3 mL                                                                                 | 25 tubes of detection buffer                                                         | ---                                                                                  |
| Time to result                     | 15 min                                                                             | 15-20 min                                                                          | 15 min                                                                             | 15 min                                                                              | 20 min                                                                               | 15 min                                                                               | 10 min                                                                               | 10-15 min                                                                            | 10 min                                                                               | 15 min                                                                               |
| Limit Of Detection                 | ---                                                                                | ---                                                                                | ---                                                                                | 3,4 ng/mL (IgG), 210 ng/mL (IgM)                                                    | ---                                                                                  | ---                                                                                  | ---                                                                                  | ---                                                                                  | ---                                                                                  | ---                                                                                  |
| Interference reported              | None reported                                                                      | None reported                                                                      | None reported                                                                      | None reported                                                                       | SARS-CoV Ab, Rheumatoid Factors, MERS-CoV Ab                                         | None reported                                                                        | ---                                                                                  | None reported                                                                        | None reported                                                                        | None reported                                                                        |
| Cross-reactivity reported on IFU   | None reported                                                                      | None reported                                                                      | None reported                                                                      | None reported                                                                       | None                                                                                 | None                                                                                 | ---                                                                                  | None reported                                                                        | None reported                                                                        | None reported                                                                        |
| Shelf-life (months)                | 24 m                                                                               | 12 m                                                                               | 18 m                                                                               | 24 m                                                                                | 24 m                                                                                 | 18 m                                                                                 | 24 m                                                                                 | 12 m                                                                                 | 12 m                                                                                 | 12 m                                                                                 |
| Storage temperature (°C)           | 2-30°C                                                                             | 2-30°C                                                                             | 4-30°C                                                                             | 2-30°C                                                                              | 2-30°C                                                                               | 4-30°C                                                                               | 4-30°C                                                                               | 2-30°C                                                                               | 4-30°C                                                                               | 4-30°C                                                                               |
| Package size                       | 5 test/ box                                                                        | 20 test/box                                                                        | 20 test/box                                                                        | 10 test/bags                                                                        | 25 test/box                                                                          | 40 test/box                                                                          | 50 test/box                                                                          | 20 test/box                                                                          | 25 test/box                                                                          | 20 test/box                                                                          |
| Controls                           | Internal control line                                                              | Internal control line                                                              | Internal control line                                                              | Internal control line                                                               | Internal control line                                                                | Internal control line                                                                | Internal control line                                                                | Internal control line                                                                | Internal control line                                                                | Internal control line                                                                |
| Performance notes                  | ---                                                                                | Some band smearing                                                                 | ---                                                                                | ---                                                                                 | ---                                                                                  | Some band smearing                                                                   | ---                                                                                  | ---                                                                                  | ---                                                                                  | ---                                                                                  |
| <b>Regulatory approval</b>         |                                                                                    |                                                                                    |                                                                                    |                                                                                     |                                                                                      |                                                                                      |                                                                                      |                                                                                      |                                                                                      |                                                                                      |
| IVD Certification                  | CE-IVD                                                                             | CE IVD, Chinese FDA-EUA,                                                           | CE IVD, Chinese FDA-EUA,                                                           | CE-IVD                                                                              | CE-IVD                                                                               | CE IVD, Chinese FDA-EUA,                                                             | CE-IVD                                                                               | CE-IVD                                                                               | CE, Chinese FDA-EUA, Taiwan FDA                                                      | CE, Chinese FDA-EUA, Taiwan FDA                                                      |
| Pictures of the Kit content        |  |  |  |  |  |  |  |  |  |  |
| Kit Acquisition for study          | Provided by supplier<br>Free of charge                                             | Purchased from supplier                                                            | Provided by supplier<br>Free of charge                                             | Purchased from supplier                                                             | Purchased from supplier                                                              | Purchased from supplier                                                              | Purchased from supplier                                                              | Purchased from supplier                                                              | Provided by supplier<br>Free of charge                                               | Provided by supplier<br>Free of charge                                               |



**Table S2.** Detail results obtained with the 254 sera of COVID negative patients

| Tests         | Rheumatoid factor |        | Hyper IgG |    | Hyper IgM |     | Sera with TPHA + |                 | Other coronavirus |     | Other |            |    | Malaria |     | Total |     |    |
|---------------|-------------------|--------|-----------|----|-----------|-----|------------------|-----------------|-------------------|-----|-------|------------|----|---------|-----|-------|-----|----|
|               | TN <sup>a</sup>   | FP     | TN        | FP | TN        | FP  | TN               | FP              | TN                | FP  | TN    | FP         | NI | TN      | FP  | n     | TN  | FP |
| <b>RDT 1</b>  | 3                 | 0      | 6         | 0  | 3         | 0   | 94               | 1G <sup>b</sup> | 11                | 0   | 128   | 1MG        | 0  | 5       | 0   | 252   | 250 | 2  |
| <b>RDT 2</b>  | 3                 | 0      | 6         | 0  | 3         | 0   | 89               | 5M+2G+1MG       | 11                | 0   | 122   | 3M+2G+1MG  | 1  | 5       | 0   | 254   | 239 | 14 |
| <b>RDT 3</b>  | 0                 | 2M+1MG | 5         | 0  | 2         | 1MG | 86               | 2M+1G+1MG       | 10                | 1MG | 121   | 2G+2MG     | 0  | ND      | ND  | 238   | 224 | 14 |
| <b>RDT 4</b>  | 3                 | 0      | 6         | 0  | 3         | 0   | 97               | 0               | 11                | 0   | 127   | 2G         | 0  | 5       | 0   | 254   | 252 | 2  |
| <b>RDT 5</b>  | 3                 | 0      | 5         | 0  | 3         | 0   | 92               | 1M+1G           | 10                | 0   | 124   | 2M+3G      | 0  | 4       | 1M  | 249   | 241 | 8  |
| <b>RDT 6</b>  | 3                 | 0      | 6         | 0  | 2         | 1G  | 95               | 1M              | 10                | 1G  | 129   | 0          | 0  | 4       | 1MG | 253   | 249 | 4  |
| <b>RDT 7*</b> | 3                 | 0      | 5         | 0  | 2         | 1G  | 12               | 2M              | 10                | 1G  | 41    | 2G         | 0  | ND      | ND  | 79    | 73  | 6  |
| <b>RDT 8</b>  | 3                 | 0      | 4         | 1G | 1         | 2G  | 72               | 10M+4G+6MG      | 8                 | 2G  | 95    | 24M+6G+4MG | 0  | 4       | 1M  | 247   | 187 | 60 |
| <b>RDT 9</b>  | 3                 | 0      | 6         | 0  | 2         | 1T  | 96               | 1T              | 11                | 0   | 127   | 2          | 0  | 2       | 0   | 251   | 247 | 4  |
| <b>RDT 10</b> | 3                 | 0      | 5         | 1T | 2         | 1T  | 94               | 3T              | 10                | 1T  | 126   | 3          | 0  | 5       | 0   | 254   | 245 | 9  |

<sup>a</sup> TN, True negative ; FP, False positive; NI, Not interpretable; ND, Not determined

<sup>b</sup> M = IgM, G = IgG, MG = IgM + IgG, T= Total Ig

\*Only part (79/254) of the collection was tested due to a limited number of tests received

**Table S3.** Usability of the ten RDTs

| RDTs                                            | 1                   | 2                   | 3                   | 4                  | 5                   | 6                   | 7            | 8            | 9         | 10           |
|-------------------------------------------------|---------------------|---------------------|---------------------|--------------------|---------------------|---------------------|--------------|--------------|-----------|--------------|
| <b>Clarity of instruction for user</b>          |                     |                     |                     |                    |                     |                     |              |              |           |              |
| Manufacturer instructions                       | Very clear          | Very clear          | Clear               | Very clear         | Very clear          | Very Clear          | Clear        | Very Clear   | Clear     | Clear        |
| Presence of pictures, schemas                   | methods and results | methods and results | methods and results | methods and result | methods and results | methods and results | results only | results only | none      | methods only |
| <b>Technical complexity</b>                     |                     |                     |                     |                    |                     |                     |              |              |           |              |
| Technical complexity                            | Very easy           | Easy                | Very easy           | Very easy          | Very easy           | Very easy           | Very easy    | Very easy    | Easy      | Very easy    |
| Number of steps                                 | 3                   | 3                   | 3                   | 3                  | 3                   | 3                   | 3            | 3            | 3         | 3            |
| Exact measurements or volumes for specimens     | No (Drop)           | Yes (µl)            | No (Drop)           | Yes (µl)           | Yes (µl)            | Yes (µl)            | No (Drop)    | Yes (µl)     | Yes (µl)  | Yes (µl)     |
| All equipment present in the kit to use test    | Yes                 | No                  | Yes                 | Yes                | Yes                 | No                  | No           | No           | Yes       | No           |
| Easy to identify the well to deposit the sample | Yes                 | Yes                 | Yes                 | Yes                | Yes                 | Yes                 | Yes          | Yes          | Yes       | Yes          |
| Easy to identify the well to deposit buffer     | Yes                 | Yes                 | Yes                 | Yes                | Yes                 | Yes                 | Yes          | Yes          | No        | Yes          |
| <b>Results interpretation</b>                   |                     |                     |                     |                    |                     |                     |              |              |           |              |
| Easiness of results interpretation              | Very easy           | Very easy           | Very easy           | Very easy          | Very easy           | Difficult           | Very easy    | Very easy    | Very easy | Very easy    |
| Reading type                                    | Visual              | Visual              | Visual              | Visual             | Visual              | Visual              | Visual       | Visual       | Visual    | Visual       |
| Time to results (min)                           | <15                 | <15                 | <15                 | <15                | <15                 | <15                 | <15          | <15          | <15       | 15-20        |
| <b>Packaging, legal information</b>             |                     |                     |                     |                    |                     |                     |              |              |           |              |
| T° storage conditions available                 | Yes                 | Yes                 | Yes                 | Yes                | Yes                 | Yes                 | Yes          | Yes          | Yes       | Yes          |
| Product reference available                     | Yes                 | Yes                 | No                  | Yes                | Ye                  | No                  | Yes          | Yes          | Yes       | Yes          |
| Single sealed package                           | Yes                 | Yes                 | Yes                 | Yes                | Yes                 | Yes                 | Yes          | Yes          | Yes       | Yes          |
| Pouch dessicant                                 | Yes                 | Yes                 | Yes                 | Yes                | Yes                 | Yes                 | Yes          | Yes          | Yes       | Yes          |
